# Supplementary material for: A robust single compartment peroxide fuel cell using mesoporous antimony doped tin oxide as the cathode material
Source: Royal Society of Chemistry journal article supplement (doi:10.1039/d4nr01375a), 2024-01-01
Supplement: d4nr01375a1.pdf [file d4nr01375a1.pdf]

## Supporting Information

### **A Robust Single Compartment Peroxide Fuel Cell Using Mesoporous Antimony Doped Tin Oxide as Cathode Material**

Anu Maria Chittilappilly Devassy, Karuna Dagaji Wankhede, Adithya Kamalakshan, and Sarthak Mandal\*

Department of Chemistry, National Institute of Technology, Tiruchirappalli, Tamil Nadu  
620015, India

Address for Correspondence:

\*Email: [smandal@nitt.edu](mailto:smandal@nitt.edu) and [sarthakmandal@gmail.com](mailto:sarthakmandal@gmail.com)

Department of Chemistry  
National Institute of Technology  
Tiruchirappalli, Tamil Nadu 620015

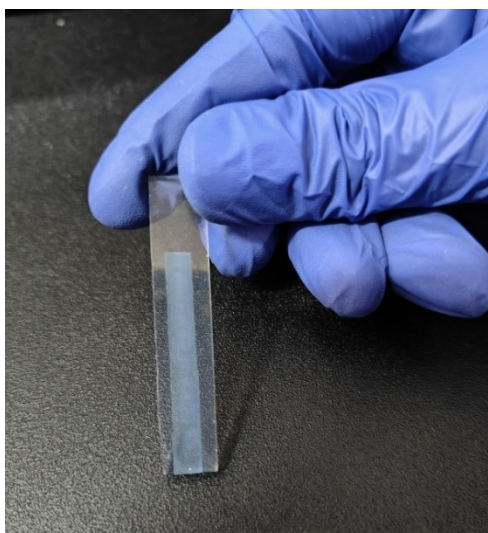

**Figure S1.** Image of the ATO film coated FTO electrode after calcination at 500°C

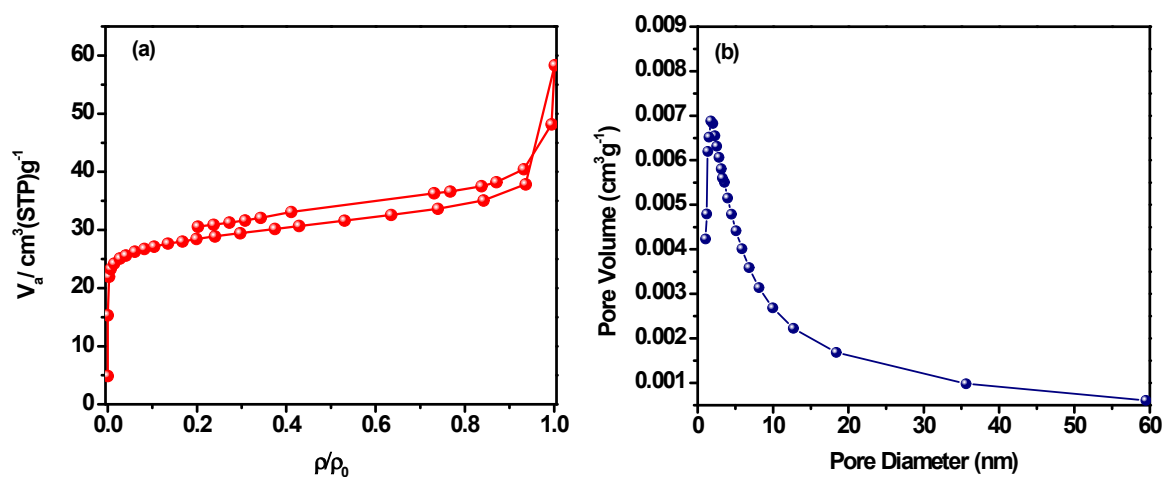

**Figure S2.** N<sub>2</sub> adsorption–desorption isotherm (a) and BJH plot pore size distribution (b) for the prepared ATO nanopowder

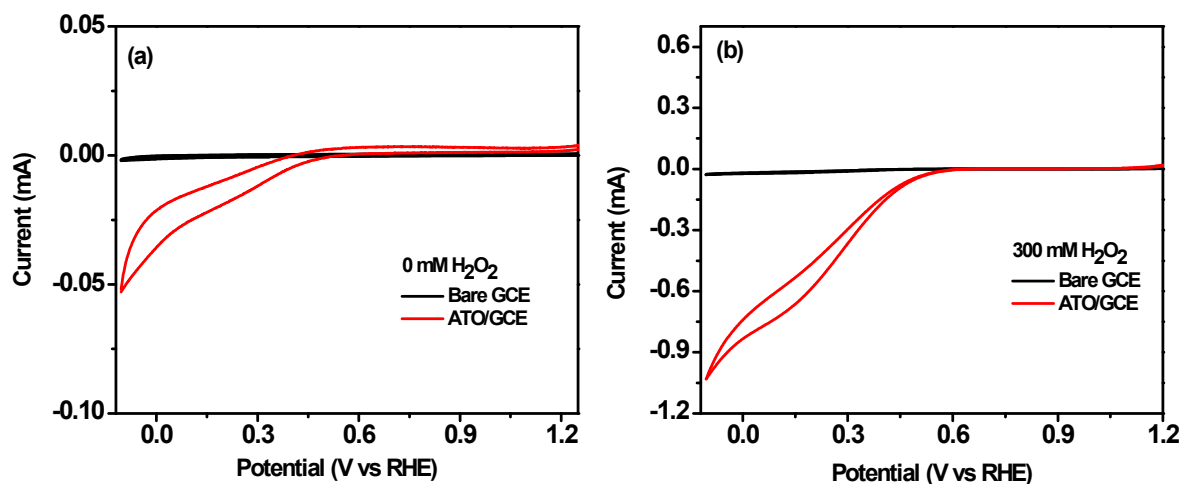

**Figure S3.** CV of ATO/GCE and bare GCE (a) without H<sub>2</sub>O<sub>2</sub> and (b) with 300 mM H<sub>2</sub>O<sub>2</sub>, in 0.05 M H<sub>2</sub>SO<sub>4</sub> solution at a scan rate of 10 mV/s using Ag/AgCl and platinum wire as reference and counter electrodes, respectively.

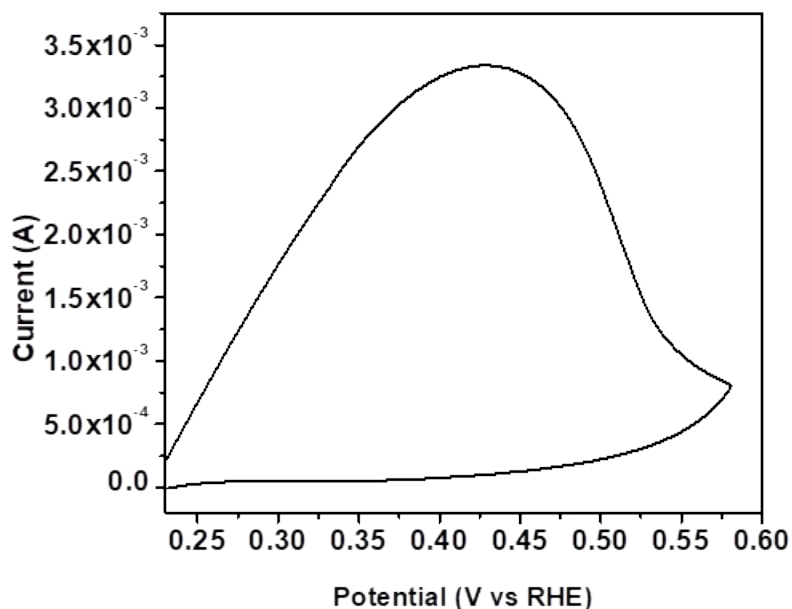

**Figure S4.** Cyclic voltammogram of Ni foam ( $0.8 \times 0.9 \text{ cm}^2$ ) with 300 mM H<sub>2</sub>O<sub>2</sub>, in 0.05 M H<sub>2</sub>SO<sub>4</sub> at a scan rate of 10 mV/s with an Ag/AgCl and platinum wire as reference and counter electrodes respectively

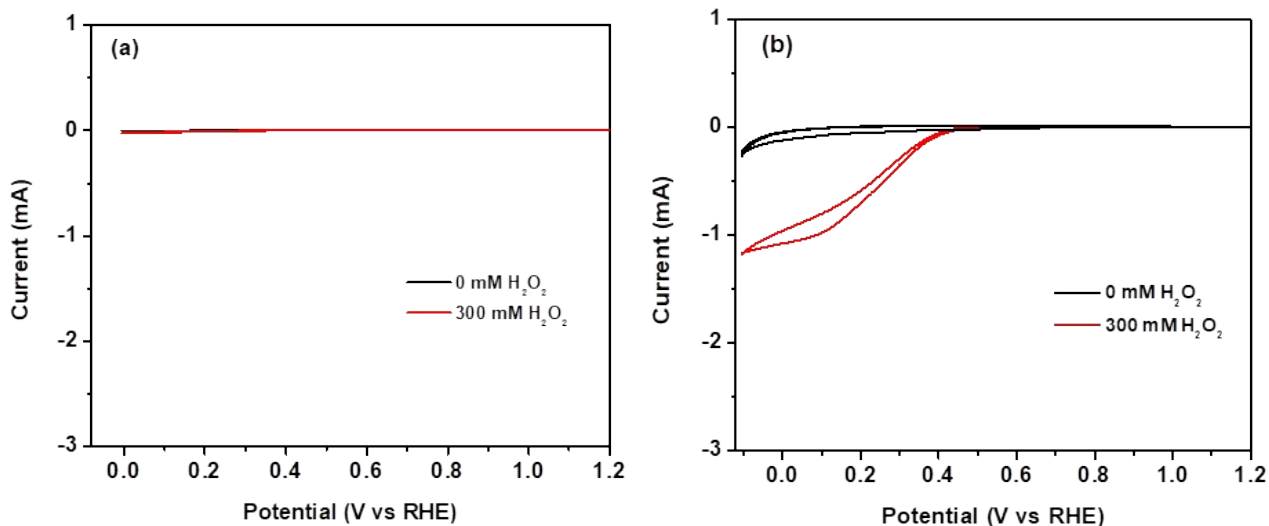

**Figure S5.** CV of (a) bare FTO and (b) SnO<sub>2</sub>/FTO with and without addition of H<sub>2</sub>O<sub>2</sub> in 0.05 M H<sub>2</sub>SO<sub>4</sub> at a scan rate of 10 mV/s with an Ag/AgCl and platinum wire as reference and counter electrodes respectively

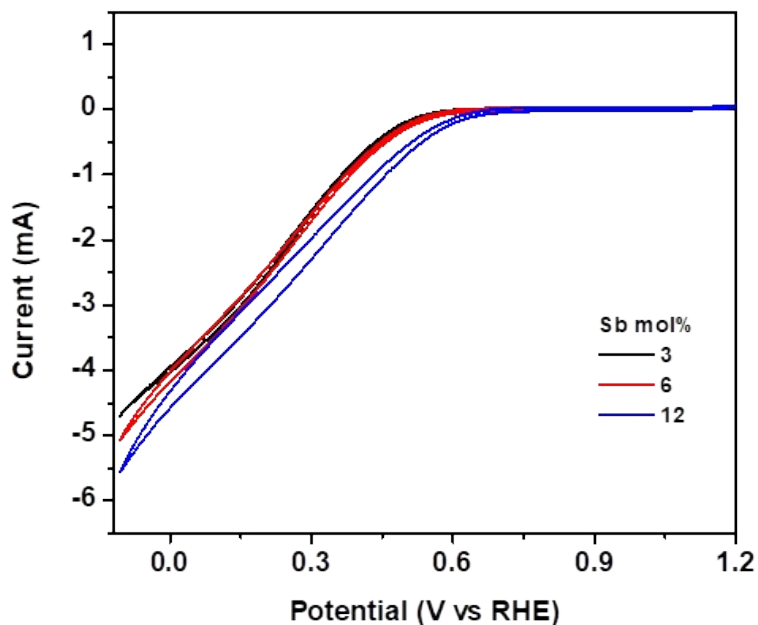

**Figure S6.** CV of three different (mol%) Sb doped SnO<sub>2</sub> coated FTO electrodes with 300 mM H<sub>2</sub>O<sub>2</sub>, from 0.05 M H<sub>2</sub>SO<sub>4</sub> at a scan rate of 10 mV/s with an Ag/AgCl and platinum wire as reference and counter electrodes respectively.

**Table S1.** Comparison table of electrochemical single compartment peroxide fuel cell (acidic) parameters for recently reported cathodic catalysts and the current catalytic system (ATO)

| Referen ce. No. | Cathode                                                  | Anode       | Electrolyte                    | OCV (V) | Power Density ( $\mu\text{W}/\text{cm}^2$ ) |
|-----------------|----------------------------------------------------------|-------------|--------------------------------|---------|---------------------------------------------|
| 1               | Prussian Blue                                            | Nickel mesh | 0.1 M HCl                      | 0.6     | 1500                                        |
| 2               | $\text{Fe}_3[\{\text{Co}^{\text{III}}(\text{CN})_6\}_2]$ | Nickel mesh | $\text{HClO}_4$<br>pH 3        | 0.78    | 1200                                        |
| 3               | $\text{Fe}[\text{M}^{\text{C}}(\text{CN})_4]$            | Nickel mesh | $\text{HClO}_4$<br>pH 1        | 0.75    | 4500                                        |
| 4               | $\text{Fe}^{\text{III}}(\text{PLY})_3$                   | Nickel foam | 0.1 M $\text{HClO}_4$          | 0.74    | 1600                                        |
| 5               | PEDOT:PSS                                                | Nickel mesh | 0.05 M HCl                     | 0.56    | 310                                         |
| 6               | CNT/hemin                                                | CNT/VitB12  | pH 7.4 buffer                  | 0.23    | 23.8                                        |
|                 | ATO                                                      | Nickel Foam | 0.05 M $\text{H}_2\text{SO}_4$ | 0.82    | 320                                         |

#### References:

1. Mousavi Shaegh, S. A.; Nguyen, N.-T.; Mousavi Ehteshami, S. M.; Chan, S. H., *Energy Environ. Sci.*, **2012**, *5* (8), 8225-8228.
2. Y. Yamada, M. Yoneda and S. Fukuzumi, *Chem. Eur. J.*, **2013**, *19*, 11733-11741.
3. Y. Yamada, M. Yoneda and S. Fukuzumi, *Inorg. Chem.*, **2014**, *53*, 1272-1274.
4. A. Pariyar, G. Vijaykumar, M. Bhunia, S. K. Dey, S. K. Singh, S. Kurungot and S. K. Mandal, *J. Am. Chem. Soc.*, **2015**, *137*, 5955-5960.
5. E. Miglbauer, P. J. Wójcik and E. D. Głowacki, *ChemComm.*, **2018**, *54*, 11873-11876.
6. Ji, J.; Chung, Y.; Kwon, Y., *J. Mater. Chem. A.*, **2020**, *8* (8), 2749-2755.
